# Supplementary material for: An Evaluation of the Diagnostic Accuracy of a Panel of Variants in DPYD and a Single Variant in ENOSF1 for Predicting Common Capecitabine Related Toxicities
Source: PubMed Central journal article supplement (PMC8037940; doi:10.3390/cancers13071497), 2021-03-24
Supplement: cancers-13-01497-s001.pdf [file cancers-13-01497-s001.pdf]

# An Evaluation of the Diagnostic Accuracy of a Panel of Variants in *DPYD* and a Single Variant in *ENOSF1* for Predicting Common Capecitabine Related Toxicities

Claire Palles, Susan Fotheringham, Laura Chegwidan, Marie Lucas, Rachel Kerr, Guy Mozolowski, Dan Rosmarin, Jenny C. Taylor, Ian Tomlinson and David Kerr

**Table S1.** Genetic markers considered for inclusion in a predictive panel. Those in models 2 and 11 have a panel variant number.

| Final Panel Variant Number | Variant ID HGVS Nomenclature Protein Change     | Associated with Global Fluoropyrimidine Toxicity                     | Detected in a DPD Deficiency Patient (Reference) | Evidence from Literature                                                                                                           | CPIC Level of Evidence | Per Allele Activity Score 1 Activity Score 2 Activity Score 3 | In <i>DPYD</i> LOVD with Pathogenic/Risk/Likely Pathogenic Scoring | Allele Frequency in QUASAR 2 | Allele Frequency in 1KG | Allele Frequency in gnomAD <sup>†</sup> Europeans (non-Finnish) | Allele Frequency in gnomAD <sup>†</sup> East Asia | Allele Frequency in gnomAD <sup>†</sup> Africa | Method of Genotyping                                              |
|----------------------------|-------------------------------------------------|----------------------------------------------------------------------|--------------------------------------------------|------------------------------------------------------------------------------------------------------------------------------------|------------------------|---------------------------------------------------------------|--------------------------------------------------------------------|------------------------------|-------------------------|-----------------------------------------------------------------|---------------------------------------------------|------------------------------------------------|-------------------------------------------------------------------|
| 1                          | rs67376798<br>NM_000110.3:c.2846C>T<br>p.D949V  | Yes OR<br>5.51 (95% CI<br>1.95–15.5, $p =$<br>0.0013)                | Yes[1]                                           | Risk allele results in 59% <i>DPYD</i> activity compared to wild type and or 5-FU toxicity [2,3].<br><b>CPIC guideline variant</b> | High                   | 0.5<br>PHENO<br>NA                                            | yes                                                                | 0.006                        | NA                      | $5.16 \times 10^{-3}$                                           | $5.30 \times 10^{-5}$                             | $9.16 \times 10^{-4}$                          | Genotyped on the Illumina Exome array                             |
| 2                          | rs3918290<br>NM_000110.3:c.1905+1<br>G>A        | Yes OR<br>5.51 (95% CI<br>1.95–15.5, $p =$<br>0.0013)*               | Yes[4–6]                                         | Catalytically inactive allele [2,7]<br><b>CPIC guideline variant</b>                                                               | High                   | /0<br>0<br>NA                                                 | yes                                                                | 0.004                        | NA                      | $8.97 \times 10^{-6}$                                           | 0                                                 | 0                                              | Genotyped on the Illumina Exome array                             |
| 3                          | rs12132152<br>NC_000001.10:g.97523004G>A        | Yes OR 3.83<br>(95% CI 3.26–<br>4.40) $p = 3.29$<br>$\times 10^{-5}$ | No                                               | Common variant associated with HFS [8]                                                                                             | Not reviewed           | Not scored – common variant                                   | no                                                                 | 0.028                        | 0.06                    | 0.028                                                           | 0                                                 | $8.48 \times 10^{-3}$                          | genotyped (Illumina array 620 and omni 2.5), imputed from hap 370 |
| 5                          | rs777425216<br>NM_000110.3:c.1651G>A<br>p.A551T |                                                                      | Yes[4]                                           | This mutation might prevent binding of the prosthetic group FMN and affect folding of the <i>DPYD</i> protein [4]                  | Weak                   | not scored not scored<br>0                                    | no                                                                 | 0.006                        | NA                      | 0                                                               | $5.80 \times 10^{-5}$                             | 0                                              | Custom KASP assay                                                 |
| 6                          | rs2612091<br>NC_000018.9:g.683607C>G            | Yes OR 1.59,<br>95% CI 1.45–<br>1.94, $p = 2.55 \times$<br>$10^{-5}$ | No                                               | Common variant associated with Hand-foot syndrome [8]                                                                              | Not reviewed           | Not scored – common variant                                   | no                                                                 | 0.552                        | NA                      | 0.554                                                           | 0.71                                              | 0.79                                           | Genotyped on all Illumina arrays                                  |

|    |                                                        |         |                                                                                                                                                                                     |              |                               |     |             |    |                       |   |                       |                                                            |
|----|--------------------------------------------------------|---------|-------------------------------------------------------------------------------------------------------------------------------------------------------------------------------------|--------------|-------------------------------|-----|-------------|----|-----------------------|---|-----------------------|------------------------------------------------------------|
| 7  | rs568132506<br>NM_000110.3:c.<br>257C>A<br>p.P86L      | Yes [1] | Analysis of the crystal structure of pig DPYD suggests that the missense variant 257C>T; Pro86Leu interferes directly or indirectly with cofactor binding or electron transport [1] | Weak         | Not scored<br>Not scored<br>0 | no  | monomorphic | NA | $5.53 \times 10^{-5}$ | 0 | 0                     | New genotyping for this study, done by amplicon sequencing |
| 8  | rs72549309<br>NM_000110.3:c.<br>299_302del<br>p.F100fs | Yes [5] | The deletion allele was associated with undetectable DPYD activity [3]                                                                                                              | Weak         | Not scored<br>NA              | yes | monomorphic | NA | 0                     | 0 | 0                     | New genotyping for this study, done by amplicon sequencing |
| 9  | rs72549308<br>NM_000110.3:c.<br>601A>C<br>p.S201R      | Yes [1] | Crystal structure of pig DPYD suggests this missense variant interferes directly or indirectly with cofactor binding or electron transport [1]                                      | Weak         | Not scored<br>NA              | no  | monomorphic | NA | $5.38 \times 10^{-5}$ | 0 | $6.54 \times 10^{-5}$ | New genotyping for this study, done by amplicon sequencing |
| 10 | rs72549307<br>NM_000110.3:c.<br>632A>G<br>p.Y211C      | Yes [1] | Identified in homozygous state in a patient with DPYD deficiency. Analysis of the crystal structure of pig DPYD suggests that the missense variant destabilises DPYD protein [1].   | Weak         | Not scored<br>NA              | no  | monomorphic | NA | $8.97 \times 10^{-6}$ | 0 | 0                     | New genotyping for this study, done by amplicon sequencing |
| 11 | rs1185250556<br>NM_000110.3:c.<br>731A>C<br>p.E244A    | Yes [4] | Mutation might interfere with the electron flow between NADPH and the pyrimidine binding site of DPYD [4]                                                                           | Not reviewed | Not scored<br>Not scored<br>0 | no  | monomorphic | NA | $1.79 \times 10^{-5}$ | 0 | 0                     | New genotyping for this study, done by amplicon sequencing |

|    |                                                                   |                                                       |                                                                                                                                                                                     |                                                                                                 |                               |      |             |        |                       |                       |                       |                                                            |                                      |
|----|-------------------------------------------------------------------|-------------------------------------------------------|-------------------------------------------------------------------------------------------------------------------------------------------------------------------------------------|-------------------------------------------------------------------------------------------------|-------------------------------|------|-------------|--------|-----------------------|-----------------------|-----------------------|------------------------------------------------------------|--------------------------------------|
| 12 | rs1801266<br>NM_000110.3:c.<br>703C>T<br>p.R235W                  | Yes[5]                                                | Identified in compound heterozygous state in a patient with DPYD deficiency[6]. T allele associated with reduced DPYD activity [3]                                                  | Weak                                                                                            | 0Not scored<br>NA             | no   | 0.002       | NA     | $9.48 \times 10^{-5}$ | $5.30 \times 10^{-5}$ | 0                     | New genotyping for this study, done by amplicon sequencing |                                      |
| 13 | 1039-<br>1042delITG<br>NM_000110.3:c.<br>1399_1400delp.<br>P466fs | Yes[1]                                                | Frameshift mutation expected to effect NADPH binding leading to an inactive protein[9]                                                                                              | Not reviewed                                                                                    | Not scored<br>Not scored<br>0 | no   | monomorphic | NA     | 0                     | 0                     | 0                     | New genotyping for this study, done by amplicon sequencing |                                      |
| 14 | IVS11+1G>T<br>NM_000110.3:c.<br>1339+1G>A                         | Yes[4]                                                | Mutation created a cryptic splice site within exon 11. Amino acids 400–446 of DPYD were missing from the mature DPYD mRNA. No DPYD activity [4] detected in homo-zygous individual. | Not reviewed                                                                                    | Not scored<br>Not scored<br>0 | no   | monomorphic | NA     | 0                     | 0                     | 0                     | New genotyping for this study, done by amplicon sequencing |                                      |
| 15 | rs72549304<br>NM_000110.3:c.<br>1475C>T<br>p.S492L                | Yes[1]                                                | Analysis of the crystal structure of pig DPYD suggests the missense variant interferes directly or indirectly with cofactor binding or electron transport [1]                       | Weak                                                                                            | 0Not scored<br>NA             | no   | monomorphic | NA     | 0                     | 0                     | $3.33 \times 10^{-4}$ | New genotyping for this study, done by amplicon sequencing |                                      |
| 16 | rs55886062<br>NM_000110.3:c.<br>1679T>G<br>p.I560S                | Yes RR 4-40,<br>95% CI 2-08-<br>9-30, $p <$<br>0.0001 | Yes[1]                                                                                                                                                                              | Allele results in low DPYD activity and or 5-FU toxicity [2,7]<br><b>CPIC guideline variant</b> | High                          | 00NA | yes         | 0.0006 | NA                    | $6.11 \times 10^{-4}$ | 0                     | $8.33 \times 10^{-5}$                                      | Genotyped using Illumina exome array |

|    |                                                     |                                                                      |         |                                                                                                                                                               |              |                                |     |           |       |                       |                       |        |                                                                   |
|----|-----------------------------------------------------|----------------------------------------------------------------------|---------|---------------------------------------------------------------------------------------------------------------------------------------------------------------|--------------|--------------------------------|-----|-----------|-------|-----------------------|-----------------------|--------|-------------------------------------------------------------------|
| 17 | rs72549303<br>NM_000110.3:c.<br>1898del<br>p.P633fs |                                                                      | Yes[6]  | Allele results in undetectable DPYD activity[3] and or 5-FU toxicity [2]                                                                                      | Weak         | 0<br>Not scored<br>NA          | no  | monomorph | NA    | 0                     | 0                     | 0      | New genotyping for this study, done by amplicon sequencing        |
| 19 | rs72547601<br>NM_000110.3:c.<br>2933A>G<br>p.H978R  |                                                                      | Yes[1]  | Analysis of the crystal structure of pig DPYD suggests the missense variant interferes directly or indirectly with cofactor binding or electron transport [1] | Weak         | 0<br>Not scored<br>NA          | no  | monomorph | NA    | 0                     | 0                     | 0      | New genotyping for this study, done by amplicon sequencing        |
| 20 | rs1801268<br>NM_000110.3:c.<br>2983G>T<br>p.V995F   |                                                                      | Yes[9]  | This missense change is located in a region thought to be involved in the binding of a [4Fe-4 S] cluster[9]                                                   | Weak         | 0                              | no  | monomorph | NA    | 0                     | 0                     | 0      | New genotyping for this study, done by amplicon sequencing        |
| 21 | rs115232898<br>NM_000110.3:c.<br>557A>G<br>p.Y186C  |                                                                      | Yes[10] | Allele results in low DPYD activity and or 5-FU toxicity [7]. It has only been observed in heterozygous state and only in African Americans[11]               | Moderate     | 0.5<br>Not scored<br>NA        | no  | monomorph | NA    | $6.33 \times 10^{-5}$ | $5.30 \times 10^{-5}$ | 0.022  | Genotyped using Illumina exome array                              |
| 22 | rs56038477<br>NM_000110.3:c.<br>1236G>A<br>p.E412E  | Yes HR 1.59,<br>95% CI 1.29–<br>1.97, $p <$<br>0.0001                | No*     | In LD with deep intronic SNP which creates a cryptic splice site[12]<br><b>CPIC guideline variant</b>                                                         | Strong       | 0.5<br>PHENO<br>NA             | yes | 0.020     | 0.022 | 0.021                 | $2.51 \times 10^{-4}$ | 0.003  | Imputed                                                           |
|    | rs895819<br>NC_000019.9:g.<br>13947292T>G           | Yes OR 1.6,<br>95% CI: 1.10–<br>2.22, $p =$<br>0.012                 | No      | SNP increases expression of MIR27a which reduces DPYD expression[13]                                                                                          | Not reviewed | Not scored –<br>common variant | no  | 0.320     | 0.328 | 0.327                 | 0.276                 | 0.5014 | Imputed. Not analysed before                                      |
|    | rs12022243<br>NM_000110.3:c.<br>1906-14763G>A       | Yes OR 1.69,<br>95% CI 1.45–<br>1.94, $p = 2.55 \times$<br>$10^{-5}$ | No      | Common SNP associated with global fluoropyrimidine toxicity[8]                                                                                                | Not reviewed | Not scored –<br>common variant | no  | 0.205     | 0.187 | 0.190                 | 0.248                 | 0.1640 | Genotyped (Illumina array 620 and omni 2.5), imputed from hap 370 |

<sup>^</sup> Frequency data obtained from gnomAD v2.1.1. Note Panel variant numbers go from 1–22 but there is no variant 4 or 18. \* results presented were from a combined analysis of rs3918290 and rs67376798. Activity score 1: Activity scores for per variant allele [14] and listed in [https://api.pharmgkb.org/v1/download/file/attachment/DPYD\\_Allele\\_Functionality\\_Table.xlsx](https://api.pharmgkb.org/v1/download/file/attachment/DPYD_Allele_Functionality_Table.xlsx) (last accessed 04/10/2020). Activity score 2: Activity scores per allele using grading system according to DPWG [15]. For

this score the authors include the category “PHENO” which means phenotyping by measuring DPD enzyme activity in peripheral blood mononuclear cells (PBMCs) or to measuring the uracil concentrations in plasma or urine is recommended by DPWG Activity score 3. Where no activity score had been calculated for a variant we scored variants based on their association with DPD deficient phenotype and the available supporting functional evidence. Functional DPD alleles would score 1 in all three scores. For heterozygous individuals with one copy of a DPD deficiency variant allele their activity score would be 1+ the scores shown in Table S1 and this score can be used to determine the correct dosing recommendation from CPIC and DPWG publications [15,16].

**Table S2.** Measures of diagnostic accuracy used to select a panel of variants for predicting 5-FU induced toxicity.

| Model Number                                                              | Test                                      | Toxicity Outcome           | True Negative | False Negative | False Positive | True Positive | Sensitivity | Specificity | AUC  | LR+   | LR-  |
|---------------------------------------------------------------------------|-------------------------------------------|----------------------------|---------------|----------------|----------------|---------------|-------------|-------------|------|-------|------|
| 1                                                                         | CPIC 2018 High level of evidence variants | Toxicity induced Death     | 794           | 0              | 49             | 2             | 1.00        | 0.94        | 0.97 | 17.20 | 0.00 |
| 1                                                                         | CPIC 2018 High level of evidence variants | Haematological 012v34      | 784           | 10             | 45             | 6             | 0.38        | 0.95        | 0.66 | 6.91  | 0.66 |
| 1                                                                         | CPIC 2018 High level of evidence variants | Haematological 0123v4      | 792           | 2              | 49             | 2             | 0.50        | 0.94        | 0.72 | 8.58  | 0.53 |
| 1                                                                         | CPIC 2018 High level of evidence variants | Diarrhoea 012v34           | 705           | 89             | 39             | 12            | 0.12        | 0.95        | 0.53 | 2.27  | 0.93 |
| 1                                                                         | CPIC 2018 High level of evidence variants | Diarrhoea 0123v4           | 786           | 9              | 50             | 1             | 0.10        | 0.94        | 0.52 | 1.67  | 0.96 |
| 1                                                                         | CPIC 2018 High level of evidence variants | Mucositis/Stomatitis 012v3 | 785           | 9              | 47             | 4             | 0.31        | 0.94        | 0.63 | 5.45  | 0.73 |
| 1                                                                         | CPIC 2018 High level of evidence variants | Global 012v34              | 539           | 255            | 22             | 29            | 0.10        | 0.96        | 0.53 | 2.60  | 0.93 |
| 1                                                                         | CPIC 2018 High level of evidence variants | HFS 012v34                 | 622           | 172            | 35             | 16            | 0.09        | 0.95        | 0.52 | 1.60  | 0.97 |
| <hr/>                                                                     |                                           |                            |               |                |                |               |             |             |      |       |      |
| 2                                                                         | CPIC 2018 plus rs777425216 and rs1801288  | Toxicity induced Death     | 791           | 0              | 52             | 2             | 1.00        | 0.94        | 0.97 | 17.04 | 0.00 |
| 2                                                                         | CPIC 2018 plus rs777425216 and rs1801288  | Haematological 012v34      | 782           | 9              | 47             | 7             | 0.44        | 0.95        | 0.69 | 8.11  | 0.59 |
| 2                                                                         | CPIC 2018 plus rs777425216 and rs1801288  | Haematological 0123v4      | 790           | 1              | 51             | 3             | 0.75        | 0.94        | 0.84 | 13.00 | 0.27 |
| 2                                                                         | CPIC 2018 plus rs777425216 and rs1801288  | Diarrhoea 012v34           | 703           | 88             | 41             | 13            | 0.13        | 0.95        | 0.54 | 2.46  | 0.92 |
| 2                                                                         | CPIC 2018 plus rs777425216 and rs1801288  | Diarrhoea 0123v4           | 782           | 9              | 53             | 1             | 0.10        | 0.94        | 0.52 | 1.65  | 0.96 |
| 2                                                                         | CPIC 2018 plus rs777425216 and rs1801288  | Mucositis/Stomatitis 012v3 | 783           | 8              | 49             | 5             | 0.38        | 0.94        | 0.66 | 6.36  | 0.66 |
| 2                                                                         | CPIC 2018 plus rs777425216 and rs1801288  | Global 012v34              | 536           | 252            | 23             | 31            | 0.11        | 0.96        | 0.53 | 2.84  | 0.93 |
| 2                                                                         | CPIC 2018 plus rs777425216 and rs1801288  | HFS 012v34                 | 617           | 170            | 37             | 17            | 0.09        | 0.94        | 0.52 | 1.61  | 0.96 |
| <hr/>                                                                     |                                           |                            |               |                |                |               |             |             |      |       |      |
| <b>Model 2 was selected in favour of the CPIC 2018 variants (model 1)</b> |                                           |                            |               |                |                |               |             |             |      |       |      |
| 3                                                                         | Model 2 plus rs12022243                   | Toxicity induced Death     | 487           | 0              | 356            | 2             | 1.00        | 0.58        | 0.79 | 2.37  | 0.00 |
| 3                                                                         | Model 2 plus rs12022243                   | Haematological 012v34      | 483           | 4              | 346            | 12            | 0.75        | 0.58        | 0.67 | 1.80  | 0.43 |
| 3                                                                         | Model 2 plus rs12022243                   | Haematological 0123v4      | 487           | 0              | 354            | 4             | 1.00        | 0.58        | 0.79 | 2.38  | 0.00 |
| 3                                                                         | Model 2 plus rs12022243                   | Diarrhoea 012v34           | 443           | 44             | 301            | 57            | 0.56        | 0.60        | 0.58 | 1.39  | 0.73 |
| 3                                                                         | Model 2 plus rs12022243                   | Diarrhoea 0123v4           | 484           | 3              | 351            | 7             | 0.70        | 0.58        | 0.64 | 1.67  | 0.52 |
| 3                                                                         | Model 2 plus rs12022243                   | Mucositis/Stomatitis 012v3 | 485           | 2              | 347            | 11            | 0.85        | 0.58        | 0.71 | 2.03  | 0.26 |
| 3                                                                         | Model 2 plus rs12022243                   | Global 012v34              | 360           | 127            | 201            | 157           | 0.55        | 0.64        | 0.60 | 1.54  | 0.70 |
| 3                                                                         | Model 2 plus rs12022243                   | HFS 012v34                 | 402           | 85             | 255            | 103           | 0.55        | 0.61        | 0.58 | 1.41  | 0.74 |
| <hr/>                                                                     |                                           |                            |               |                |                |               |             |             |      |       |      |
| 4                                                                         | Model 2 plus rs12132152                   | Toxicity induced Death     | 747           | 0              | 96             | 2             | 1.00        | 0.89        | 0.94 | 8.78  | 0.00 |
| 4                                                                         | Model 2 plus rs12132152                   | Haematological 012v34      | 738           | 9              | 91             | 7             | 0.44        | 0.89        | 0.66 | 3.99  | 0.63 |
| 4                                                                         | Model 2 plus rs12132152                   | Haematological 0123v4      | 746           | 1              | 95             | 3             | 0.75        | 0.89        | 0.82 | 6.64  | 0.28 |
| 4                                                                         | Model 2 plus rs12132152                   | Diarrhoea 012v34           | 661           | 86             | 83             | 15            | 0.15        | 0.89        | 0.52 | 1.33  | 0.96 |
| 4                                                                         | Model 2 plus rs12132152                   | Diarrhoea 0123v4           | 738           | 9              | 97             | 1             | 0.10        | 0.88        | 0.49 | 0.86  | 1.02 |
| 4                                                                         | Model 2 plus rs12132152                   | Mucositis/Stomatitis 012v3 | 740           | 7              | 92             | 6             | 0.46        | 0.89        | 0.68 | 4.17  | 0.61 |
| 4                                                                         | Model 2 plus rs12132152                   | Global 012v34              | 520           | 227            | 41             | 57            | 0.20        | 0.93        | 0.56 | 2.75  | 0.86 |
| 4                                                                         | Model 2 plus rs12132152                   | HFS 012v34                 | 597           | 150            | 60             | 38            | 0.20        | 0.91        | 0.56 | 2.21  | 0.88 |

|                                                                                                                                                                                                                                                                |                               |                            |     |     |     |     |      |      |        |      |      |
|----------------------------------------------------------------------------------------------------------------------------------------------------------------------------------------------------------------------------------------------------------------|-------------------------------|----------------------------|-----|-----|-----|-----|------|------|--------|------|------|
| 5                                                                                                                                                                                                                                                              | Model 2 plus rs2612091        | Toxicity induced Death     | 232 | 0   | 611 | 2   | 1.00 | 0.28 | 0.64   | 1.38 | 0.00 |
| 5                                                                                                                                                                                                                                                              | Model 2 plus rs2612091        | Haematological 012v34      | 230 | 2   | 599 | 14  | 0.88 | 0.28 | 0.58   | 1.21 | 0.45 |
| 5                                                                                                                                                                                                                                                              | Model 2 plus rs2612091        | Haematological 0123v4      | 231 | 1   | 610 | 3   | 0.75 | 0.27 | 0.51   | 1.03 | 0.91 |
| 5                                                                                                                                                                                                                                                              | Model 2 plus rs2612091        | Diarrhoea 012v34           | 209 | 23  | 535 | 78  | 0.77 | 0.28 | 0.53   | 1.07 | 0.81 |
| 5                                                                                                                                                                                                                                                              | Model 2 plus rs2612091        | Diarrhoea 0123v4           | 227 | 5   | 608 | 5   | 0.50 | 0.27 | 0.39   | 0.69 | 1.84 |
| 5                                                                                                                                                                                                                                                              | Model 2 plus rs2612091        | Mucositis/Stomatitis 012v3 | 230 | 2   | 602 | 11  | 0.85 | 0.28 | 0.56   | 1.17 | 0.56 |
| 5                                                                                                                                                                                                                                                              | Model 2 plus rs2612091        | Global 012v34              | 178 | 54  | 383 | 230 | 0.81 | 0.32 | 0.56   | 1.19 | 0.60 |
| 5                                                                                                                                                                                                                                                              | Model 2 plus rs2612091        | HFS 012v34                 | 197 | 35  | 460 | 153 | 0.81 | 0.30 | 0.56   | 1.16 | 0.62 |
| 6                                                                                                                                                                                                                                                              | Model 2 plus rs895819         | Toxicity induced Death     | 335 | 0   | 463 | 2   | 1.00 | 0.42 | 0.71   | 1.72 | 0.00 |
| 6                                                                                                                                                                                                                                                              | Model 2 plus rs895819         | Haematological 012v34      | 329 | 6   | 455 | 10  | 0.63 | 0.42 | 0.52   | 1.08 | 0.89 |
| 6                                                                                                                                                                                                                                                              | Model 2 plus rs895819         | Haematological 0123v4      | 334 | 1   | 462 | 3   | 0.75 | 0.42 | 0.58   | 1.29 | 0.60 |
| 6                                                                                                                                                                                                                                                              | Model 2 plus rs895819         | Diarrhoea 012v34           | 311 | 24  | 396 | 69  | 0.74 | 0.44 | 0.59   | 1.32 | 0.59 |
| 6                                                                                                                                                                                                                                                              | Model 2 plus rs895819         | Diarrhoea 0123v4           | 334 | 1   | 457 | 8   | 0.89 | 0.42 | 0.66   | 1.54 | 0.26 |
| 6                                                                                                                                                                                                                                                              | Model 2 plus rs895819         | Mucositis/Stomatitis 012v3 | 333 | 2   | 454 | 11  | 0.85 | 0.42 | 0.63   | 1.47 | 0.36 |
| 6                                                                                                                                                                                                                                                              | Model 2 plus rs895819         | Global 012v34              | 235 | 100 | 299 | 166 | 0.62 | 0.44 | 0.53   | 1.11 | 0.85 |
| 6                                                                                                                                                                                                                                                              | Model 2 plus rs895819         | HFS 012v34                 | 262 | 73  | 364 | 101 | 0.58 | 0.42 | 0.50   | 1.00 | 1.00 |
| <b>Models 3-6 were rejected based upon the reduced specificity of predicting toxicity induced death and haematological toxicities. Next examined clinical utility of common variants associated with toxicity to predict diarrhoea and HFS risk separately</b> |                               |                            |     |     |     |     |      |      |        |      |      |
| 7                                                                                                                                                                                                                                                              | rs895819                      | Diarrhoea 012v34           | 340 | 29  | 373 | 63  | 0.68 | 0.48 | 0.58   | 1.31 | 0.66 |
| 7                                                                                                                                                                                                                                                              | rs895819                      | Diarrhoea 0123v4           | 368 | 1   | 428 | 8   | 0.89 | 0.46 | 0.68   | 1.65 | 0.24 |
| 8                                                                                                                                                                                                                                                              | rs12022243                    | Diarrhoea 012v34           | 505 | 51  | 243 | 45  | 0.47 | 0.68 | 0.57   | 1.44 | 0.79 |
| 8                                                                                                                                                                                                                                                              | rs12022243                    | Diarrhoea 0123v4           | 552 | 4   | 282 | 6   | 0.60 | 0.66 | 0.62   | 1.77 | 0.60 |
| 8                                                                                                                                                                                                                                                              | rs12022243                    | HFS 012v34                 | 450 | 106 | 237 | 88  | 0.45 | 0.66 | 0.56   | 1.31 | 0.83 |
| 9                                                                                                                                                                                                                                                              | rs2612091                     | HFS 012v34                 | 218 | 40  | 468 | 153 | 0.79 | 0.32 | 0.55   | 1.16 | 0.65 |
| 10                                                                                                                                                                                                                                                             | rs12132152                    | HFS 012v34                 | 662 | 168 | 25  | 25  | 0.13 | 0.96 | 0.56   | 3.56 | 0.90 |
| 11                                                                                                                                                                                                                                                             | rs2612091+rs12132152          | HFS 012v34                 | 212 | 31  | 474 | 161 | 0.84 | 0.31 | 0.57   | 1.21 | 0.52 |
| 12                                                                                                                                                                                                                                                             | rs2612091+rs12022243          | HFS 012v34                 | 144 | 23  | 542 | 170 | 0.88 | 0.21 | 0.54   | 1.11 | 0.57 |
| 13                                                                                                                                                                                                                                                             | rs12022243+rs12132152         | HFS 012v34                 | 440 | 93  | 247 | 100 | 0.52 | 0.64 | 0.58   | 1.44 | 0.75 |
| 14                                                                                                                                                                                                                                                             | all three                     | HFS 012v34                 | 148 | 20  | 543 | 175 | 0.90 | 0.21 | 0.56   | 1.14 | 0.48 |
| 15                                                                                                                                                                                                                                                             | all three (cut point 2)       | HFS 012v34                 | 425 | 81  | 266 | 114 | 0.58 | 0.62 | 0.60   | 1.52 | 0.68 |
| <b>Model including rs2612091 and rs12132152 has too low specificity to be clinically useful for predicting non HFS toxicities</b>                                                                                                                              |                               |                            |     |     |     |     |      |      |        |      |      |
| 16                                                                                                                                                                                                                                                             | Model 2 and Model 11 combined | Toxicity induced Death     | 220 | 0   | 622 | 2   | 1.00 | 0.26 | 0.6306 | 1.35 | 0.00 |
| 16                                                                                                                                                                                                                                                             | Model 2 and Model 11 combined | Haematological 012v34      | 218 | 2   | 610 | 14  | 0.88 | 0.26 | 0.5691 | 1.19 | 0.47 |
| 16                                                                                                                                                                                                                                                             | Model 2 and Model 11 combined | Haematological 0123v4      | 219 | 1   | 621 | 3   | 0.75 | 0.26 | 0.5054 | 1.01 | 0.96 |
| 16                                                                                                                                                                                                                                                             | Model 2 and Model 11 combined | Diarrhoea 012v34           | 198 | 22  | 545 | 79  | 0.78 | 0.27 | 0.5243 | 1.07 | 0.82 |
| 16                                                                                                                                                                                                                                                             | Model 2 and Model 11 combined | Diarrhoea 0123v4           | 215 | 5   | 619 | 5   | 0.50 | 0.26 | 0.3789 | 0.67 | 1.94 |
| 16                                                                                                                                                                                                                                                             | Model 2 and Model 11 combined | Mucositis/Stomatitis 012v3 | 218 | 2   | 613 | 11  | 0.85 | 0.26 | 0.5542 | 1.15 | 0.59 |
| 16                                                                                                                                                                                                                                                             | Model 2 and Model 11 combined | Global 012v34              | 175 | 45  | 386 | 238 | 0.84 | 0.31 | 0.5765 | 1.22 | 0.51 |
| 16                                                                                                                                                                                                                                                             | Model 2 and Model 11 combined | HFS 012v34                 | 192 | 28  | 465 | 159 | 0.85 | 0.29 | 0.5713 | 1.20 | 0.51 |

Models being compared: NM\_000110.3: c.2846C>T, NM\_000110.3: c.1905+1, NM\_000110.3: c.1679T>G, NM\_000110.3: c.1236G>A) (CPIC 2018, model 1), CPIC 2018 + NM\_000110.3: c.257C>A +NM\_000110.3: c.703C>T (model 2) vs CPIC 2018 + NM\_000110.3: c.257C>A +NM\_000110.3: c.703C>T + NM\_000110.3: c.1906-14763G>A (model 3), CPIC 2018 + NM\_000110.3: c.257C>A +NM\_000110.3: c.703C>T + rs12132152 (model 4) , CPIC 2018 + NM\_000110.3: c.257C>A +NM\_000110.3: c.703C>T + rs2612091 (model 5) CPIC 2018 + NM\_000110.3: c.257C>A +NM\_000110.3: c.703C>T + rs895819 (model 6), rs895819 (model 7), NM\_000110.3: c.1906-14763G>A (rs12022243) (model 8), rs2612091 (model 9), rs12132152 (model 10), rs2612091+ rs12132152 (model 11), rs2612091+ rs12022243 (model 12), rs12022243+ rs12132152 (model 13), rs2612091+ rs12022243+ rs12132152 cut point 1 (model 14), rs2612091+ rs12022243+ rs12132152 cut point 2 (model 15).

**Table S3.** Genetic markers included in other tests to predict toxicity if treated with capecitabine and other fluoropyrimidine based therapy.

| Panel Designation                             | Genetic Markers Included (no.)   | Genetic Marker Details                                               | Genetic Markers Unique to This Test when Compared to Model 2                                  | Dosing Recommendations Summary                                                                                                                                                                                                                                                                                         | Notable Test Feature                                                                                                                                                                                             |
|-----------------------------------------------|----------------------------------|----------------------------------------------------------------------|-----------------------------------------------------------------------------------------------|------------------------------------------------------------------------------------------------------------------------------------------------------------------------------------------------------------------------------------------------------------------------------------------------------------------------|------------------------------------------------------------------------------------------------------------------------------------------------------------------------------------------------------------------|
| Model 2                                       | 20 (18 general toxicity)         | see Table S1 for details                                             | N/A                                                                                           | Yes, see Table 2 for details                                                                                                                                                                                                                                                                                           | 2 genetic markers included associated with risk of HFS                                                                                                                                                           |
| CPIC 2013 guideline markers                   | 3                                | rs67376798, rs3918290, rs55886062,                                   | N/A                                                                                           | Yes[2]                                                                                                                                                                                                                                                                                                                 |                                                                                                                                                                                                                  |
| CPIC 2018 guideline markers (same as model 1) | 4                                | rs67376798, rs3918290, rs55886062, rs75017182 (c.1129-5923C>G/HapB3) | rs75017182 (a proxy rs56038477 is included in Model 2 which in perfect LD in with rs75017182) | This provider <sup>1</sup> with a test based on these markers returns predicted DPYD enzyme activity for all 4 variants (0% for rs3918290 and 55886062 and 50% for rs67376798 and HapB3) and makes reference to CPIC 2018 clinical guidelines                                                                          | One provider of this test updated website to include recommendation that genotype of the decreased function variant rs115232898 (c.557A>G) p.(Tyr186Cys) in individuals with African ancestry should be assessed |
| CPIC 2018 and rs1801158                       | 5                                | rs67376798, rs3918290, rs55886062, rs56038477, rs1801158             | rs1801158                                                                                     | Provider <sup>2</sup> recommends dose reductions or alternative therapy for rs3918290 and rs55886062 (50%), rs67376798 and HapB3 (25%). Dose reduction of 20% and followed by incremental dose increase for rs1801158. No fluoropyrimidines for homozygote rs3918290 and 75% dose for any other compound heterozygotes |                                                                                                                                                                                                                  |
| CPIC 2013 and rs72549309                      | 4 (+phenotype testing see notes) | rs67376798, rs3918290, rs72549309, rs55886062                        | N/A                                                                                           | Yes, recommendations based on combination of genotype and phenotype test <sup>3</sup> .                                                                                                                                                                                                                                | Phenotypic testing combining testing of pre-treatment plasma levels of the endogenous natural uracil substrate (U) and its metabolite dihydrouracil (UH2).                                                       |

<sup>1</sup> <https://www.exeterlaboratory.com/genetics/prediction-of-5-fluorouracil-toxicity/> (last accessed 04/10/2020); <sup>2</sup> <http://www.viopath.co.uk/our-tests/mutation-analysis-dpd-for-5-fluorouracil-toxicity> (last accessed 04/10/2020); <sup>3</sup> <https://www.eurofins.ie/biomnis/latest-news/dpd-deficiency-testing-and-therapeutic-drug-monitoring/> (last accessed 04/10/2020).

**Table S4.** Measures of diagnostic accuracy of model 2 and model 11 compared to alternative testing panels currently available in the UK.

| Test                                                | Toxicity Outcome            | True Negative | False Negative | False Positive | True Positive | Sensitivity | Specificity | NPV  | PPV  | AUC  | LR+   | LR-  |
|-----------------------------------------------------|-----------------------------|---------------|----------------|----------------|---------------|-------------|-------------|------|------|------|-------|------|
| Model 2                                             | Toxicity induced Death      | 791           | 0              | 52             | 2             | 1.00        | 0.94        | 1.00 | 0.04 | 0.97 | 16.21 | 0.00 |
|                                                     | Neutropenia 012 v 34        | 782           | 9              | 47             | 7             | 0.44        | 0.94        | 0.99 | 0.13 | 0.69 | 7.72  | 0.60 |
|                                                     | Neutropenia 0123 v 4        | 790           | 1              | 51             | 3             | 0.75        | 0.94        | 1.00 | 0.06 | 0.84 | 12.37 | 0.27 |
|                                                     | Diarrhoea 012 v 34          | 703           | 88             | 41             | 13            | 0.13        | 0.94        | 0.89 | 0.24 | 0.54 | 2.34  | 0.92 |
|                                                     | Diarrhoea 0123 v 4          | 782           | 9              | 53             | 1             | 0.10        | 0.94        | 0.99 | 0.02 | 0.52 | 1.58  | 0.96 |
|                                                     | Mucositis/ Stomatitis_012v3 | 783           | 8              | 49             | 5             | 0.38        | 0.94        | 0.99 | 0.09 | 0.66 | 6.53  | 0.65 |
|                                                     | Global 012 v 34             | 536           | 252            | 23             | 31            | 0.38        | 0.94        | 0.99 | 0.09 | 0.53 | 6.53  | 0.65 |
| HFS 012 v 34                                        | 617                         | 170           | 37             | 17             | 0.11          | 0.96        | 0.68        | 0.57 | 0.52 | 2.66 | 0.93  |      |
| Model 11                                            | HFS 012 v 34                | 212           | 31             | 474            | 161           | 0.84        | 0.31        | 0.87 | 0.25 | 0.57 | 1.21  | 0.52 |
| CPIC 2013 and NM_000110.3:c.299_302del (rs72549309) | Toxicity induced Death      | 848           | 0              | 16             | 2             | 1.00        | 0.98        | 1.00 | 0.11 | 0.99 | 54.00 | 0.00 |
|                                                     | Neutropenia 012 v 34        | 837           | 11             | 13             | 5             | 0.31        | 0.98        | 0.99 | 0.28 | 0.65 | 20.43 | 0.70 |
|                                                     | Neutropenia 0123 v 4        | 846           | 2              | 16             | 2             | 0.50        | 0.98        | 1.00 | 0.11 | 0.74 | 26.94 | 0.51 |
|                                                     | Diarrhoea 012 v 34          | 749           | 98             | 14             | 4             | 0.04        | 0.98        | 0.88 | 0.22 | 0.51 | 2.14  | 0.98 |
|                                                     | Diarrhoea 0123 v 4          | 838           | 9              | 17             | 1             | 0.10        | 0.98        | 0.99 | 0.06 | 0.54 | 5.03  | 0.92 |
|                                                     | Mucositis/ Stomatitis_012v3 | 836           | 12             | 16             | 2             | 0.14        | 0.98        | 0.99 | 0.11 | 0.56 | 7.61  | 0.87 |
|                                                     | Global 012 v 34             | 575           | 273            | 6              | 12            | 0.04        | 0.99        | 0.68 | 0.67 | 0.52 | 4.08  | 0.97 |
| HFS 012 v 34                                        | 663                         | 184           | 13             | 5              | 0.03          | 0.98        | 0.78        | 0.28 | 0.50 | 1.38 | 0.99  |      |
| CPIC 2018 and NM_000110.3:c.1601G>A (rs1801158)     | Toxicity induced Death      | 754           | 0              | 84             | 2             | 1.00        | 0.90        | 1.00 | 0.02 | 0.95 | 9.98  | 0.00 |
|                                                     | Neutropenia 012 v 34        | 744           | 10             | 80             | 6             | 0.38        | 0.90        | 0.99 | 0.07 | 0.64 | 3.86  | 0.69 |
|                                                     | Neutropenia 0123 v 4        | 752           | 2              | 84             | 2             | 0.50        | 0.90        | 1.00 | 0.02 | 0.70 | 4.98  | 0.56 |
|                                                     | Diarrhoea 012 v 34          | 671           | 83             | 70             | 16            | 0.16        | 0.91        | 0.89 | 0.19 | 0.53 | 1.71  | 0.93 |
|                                                     | Diarrhoea 0123 v 4          | 747           | 7              | 84             | 2             | 0.22        | 0.90        | 0.99 | 0.02 | 0.56 | 2.20  | 0.87 |
|                                                     | Mucositis/ Stomatitis_012v3 | 745           | 9              | 82             | 4             | 0.31        | 0.90        | 0.99 | 0.05 | 0.60 | 3.10  | 0.77 |
|                                                     | Global 012 v 34             | 514           | 240            | 44             | 42            | 0.15        | 0.92        | 0.68 | 0.49 | 0.54 | 1.89  | 0.92 |
| HFS 012 v 34                                        | 591                         | 163           | 62             | 24             | 0.13          | 0.91        | 0.78        | 0.28 | 0.52 | 1.35 | 0.96  |      |

Some of the tests available in the UK only contain the four variants with high level evidence in the CPIC 2018 review and recommended for clinical testing by DPWG. The performance of these four variants versus the panel finally selected (panel 2 and panel 11 SNPs) can be seen in Table 2. NPV = negative predictive value; PPV = positive predictive value; AUC = area under the curve.



**Table S5.** Comparison of the performance of model2 and model 11 to available commercial tests that are not identical to the CPIC/DPWG high level evidence set of four variants.

| Outcome Tested                | Model 2 (or 11 for HFS) AUC<br>95% CI | AUC Difference Model 2/11 versus CPIC<br>2013 and NM_000110.3:c.299_302del<br>(rs72549309)<br>(95%CI)<br><i>p</i> |                                                            | AUC Difference Model 2/11 versus<br>CPIC 2018 and NM_000110.3:c.1601G>A<br>(rs1801158)<br>(95%CI)<br><i>p</i> |                                             |
|-------------------------------|---------------------------------------|-------------------------------------------------------------------------------------------------------------------|------------------------------------------------------------|---------------------------------------------------------------------------------------------------------------|---------------------------------------------|
|                               |                                       | Death                                                                                                             | 0.999<br>(0.999–1.000)                                     | –0.001 (–0.003–0.0002)<br><i>p</i> = 0.09                                                                     | 0.00004 (–0.0001–0.0002)<br><i>p</i> = 0.61 |
| Haematological<br>0123v4      | 0.850<br>(0.592–1.107)                | –0.166 (–0.430–0.098)<br><i>p</i> = 0.22                                                                          | –0.128 (–0.388–0.132)<br><i>p</i> = 0.34                   |                                                                                                               |                                             |
| Haematological<br>012v34      | 0.664<br>(0.522–0.806)                | –0.057(–0.129–0.014)<br><i>p</i> = 0.12                                                                           | –0.043 (–0.1389–0.053)<br><i>p</i> = 0.38                  |                                                                                                               |                                             |
| Diarrhoea<br>0123v4           | 0.464<br>(0.338–0.591)                | 0.045 (–0.085–0.174)<br><i>p</i> = 0.5                                                                            | <b>0.040 (0.025–0.054)</b><br><b><i>p</i> &lt; 0.0001</b>  |                                                                                                               |                                             |
| Diarrhoea<br>012v34           | 0.483<br>(0.440–0.525)                | 0.475 (0.427–0.522)<br><i>p</i> = 0.59                                                                            | –0.154 (–0.050–0.020)<br><i>p</i> = 0.39                   |                                                                                                               |                                             |
| Mucositis/Stomatitis<br>012v3 | 0.631<br>(0.472–0.790)                | –0.068 (–0.161–0.26)<br><i>p</i> = 0.16                                                                           | –0.102 (–0.238–0.033)<br><i>p</i> = 0.14                   |                                                                                                               |                                             |
| Global<br>012v34              | 0.482<br>(0.456–0.508)                | –0.005 (–0.0257–0.0149)<br><i>p</i> = 0.6                                                                         | 0.002 (–0.021–0.024)<br><i>p</i> = 0.88                    |                                                                                                               |                                             |
| HFS<br>012v34                 | 0.634<br>(0.594–0.674)                | <b>–0.184 (–0.232–0.135)</b><br><b><i>p</i> &lt; 0.0001</b>                                                       | <b>–0.175(–0.221–0.130)</b><br><b><i>p</i> &lt; 0.0001</b> |                                                                                                               |                                             |

Model 2 variants are used to predict all toxicities apart from HFS. Model 11 is used to predict HFS only.

**Table S6.** Details of patients classified as high risk or critical risk by model 2.

| CTCAE Grade Event        |                                                         |                               |                         |                              |                       |                  |           |     |               |                                      |                                                                |                                                              |                                                         |
|--------------------------|---------------------------------------------------------|-------------------------------|-------------------------|------------------------------|-----------------------|------------------|-----------|-----|---------------|--------------------------------------|----------------------------------------------------------------|--------------------------------------------------------------|---------------------------------------------------------|
| ID                       | Risk Geno-<br>type(s)                                   | Activ-<br>ity<br>Score $\psi$ | Cycles<br>Re-<br>ceived | Toxicity<br>Induced<br>Death | Thrombo-<br>cytopenia | Neutro-<br>penia | Diarrhoea | HFS | Vomi-<br>ting | Muco-si-<br>tis/<br>Stom-<br>atitits | Other Side Effects<br>(grade/cycle(s))                         | Cycle when<br>dose<br>Redu-<br>ction<br>made, %<br>Reduction | Dose De-<br>lay (Cy-<br>cle, Delay<br>in Weeks)         |
| CRITICAL RISK PREDICTION |                                                         |                               |                         |                              |                       |                  |           |     |               |                                      |                                                                |                                                              |                                                         |
| 13                       | rs1801266 ho-<br>mozygote                               | 0                             | 8                       |                              | 0                     | 0                | 1         | 3   | 0             | 1                                    |                                                                | 2,25,4,25,6,2<br>5                                           | 2,1,3,1                                                 |
| 14                       | rs3918290 het-<br>erozygote,<br>HapB3 hetero-<br>zygote | 0.5                           | 1                       | 1                            | 4                     | 4                | 0         | 3   | 0             | 3                                    | Respiratory failure<br>secondary to neutro-<br>penia.          | NA                                                           | With-<br>drew af-<br>ter/<br>during<br>first cycle      |
| HIGH RISK PREDICTION     |                                                         |                               |                         |                              |                       |                  |           |     |               |                                      |                                                                |                                                              |                                                         |
| 1                        | rs1801266 het-<br>erozygote                             | 1                             | 8                       |                              | 0                     | 0                | 1         | 1   | 0             | 1                                    | Fatigue (3/1), dizzi-<br>ness (not graded/ 2)                  | 3,25                                                         | 3,1                                                     |
| 2                        | rs3918290 het-<br>erozygote                             | 1                             | 1                       |                              | 0                     | 0                | 2         | 0   | 0             | 0                                    | Dehydration (3/1)                                              | NA                                                           | With-<br>drew af-<br>ter/<br>dur-<br>ing first<br>cycle |
| 3                        | rs55886062<br>heterozygote                              | 1                             | 8                       |                              | 0                     | 0                | 1         | 2   | 0             | 1                                    | Skin rash on face (not<br>graded/1), Fatigue<br>(not graded/3) | 2,25, 4,25                                                   | no delays                                               |
| 4                        | rs67376798<br>heterozygote                              | 1                             | 8                       |                              | 0                     | 3                | 1         | 1   | 0             | 0                                    |                                                                | 2,25                                                         | 2,3, 3,1                                                |
| 5                        | rs3918290 het-<br>erozygote                             | 1                             | 3                       |                              | 0                     | 0                | 0         | 3   | 0             | 0                                    |                                                                | 2,20                                                         | 2,1,3,1                                                 |
| 6                        | rs67376798<br>heterozygote                              | 1                             | 6                       |                              | 0                     | 0                | 1         | 3   | 0             | 1                                    |                                                                | 2,50 *                                                       | 7,2                                                     |

|    |                          |     |   |   |   |   |   |   |    |   |                                                                                           |               |                                   |
|----|--------------------------|-----|---|---|---|---|---|---|----|---|-------------------------------------------------------------------------------------------|---------------|-----------------------------------|
| 7  | rs3918290 heterozygote   | 1   | 8 |   | 0 | 0 | 2 | 1 | 1  | 0 |                                                                                           | No reductions | 2,4                               |
| 8  | rs67376798, heterozygote | 1   | 8 |   | 1 | 3 | 2 | 1 | 0  | 0 |                                                                                           | 3,25          | 2,3,3,3,7,2                       |
| 9  | rs3918290 heterozygote   | 1   | 8 |   | 0 | 0 | 1 | 2 | 0  | 0 | Recurrent HFS (2/3,4)                                                                     | 5,30          | no delays                         |
| 10 | rs67376798 heterozygote  | 1   | 2 |   | 0 | 0 | 3 | 0 | 0  | 0 |                                                                                           | No reductions | withdrew after 2 cycles           |
| 11 | rs67376798, heterozygote | 1   | 8 |   | 0 | 0 | 2 | 1 | 0  | 1 |                                                                                           | No reductions | no delays                         |
| 12 | rs3918290 heterozygote   | 1   | 8 |   | 0 | 0 | 1 | 3 | 0  | 0 |                                                                                           | 4,22          | 4,2                               |
| 15 | rs67376798 heterozygote  | 1   | 1 |   | 0 | 0 | 3 | 0 | 2  | 0 |                                                                                           | NA            | withdrew after/during first cycle |
| 16 | rs67376798 heterozygote  | 1   | 8 |   | 0 | 0 | 4 | 0 | 0  | 1 |                                                                                           | 2,50          | 2,1                               |
| 17 | rs67376798 heterozygote  | 1   | 1 | 1 | 4 | 4 | 2 | 1 | -9 | 2 | Neutropenic colitis and left ventricular hypertrophy.                                     | NA            | Withdrew after/during first cycle |
| 18 | rs777425216 heterozygote | 1   | 1 |   | 4 | 4 | 3 | 2 | 0  | 3 |                                                                                           | NA            | Withdrew after/during first cycle |
| 19 | rs67376798 heterozygote  | 1   | 8 |   | 0 | 2 | 3 | 1 | 0  | 2 |                                                                                           | 4,25          | 2,1,4,2                           |
| 20 | rs3918290 heterozygote   | 1   | 1 |   | 0 | 3 | 3 | 0 | 0  | 0 |                                                                                           | NA            | Withdrew after/during first cycle |
| 21 | rs67376798 heterozygote  | 1   | 1 |   | 0 | 0 | 1 | 3 | 3  | 3 |                                                                                           | NA            | Withdrew after/during first cycle |
| 22 | HapB3 heterozygote       | 1.5 | 8 |   | 0 | 0 | 0 | 2 | 0  | 0 |                                                                                           | 0             | no delays                         |
| 23 | HapB3 heterozygote       | 1.5 | 8 |   | 0 | 0 | 1 | 3 | 0  | 1 | Fatigue (1,3)                                                                             | 4,25          | no delays                         |
| 24 | HapB3 heterozygote       | 1.5 | 8 |   | 0 | 0 | 1 | 0 | 0  | 1 | Skin rash (1,1), muscle/joint pain (1,2), fatigue (1,3), dry skin (1,3)                   | 0             | no delays                         |
| 25 | HapB3 heterozygote       | 1.5 | 8 |   | 0 | 0 | 2 | 3 | 0  | 0 | Tremor (2,2)                                                                              | 3,30          | no delays                         |
| 26 | HapB3 heterozygote       | 1.5 | 8 |   | 0 | 0 | 1 | 3 | 0  | 1 | Fatigue (1,1), glucoseuria/hyperglycemia (1,1)                                            | 2,25,3,25     |                                   |
| 27 | HapB3 heterozygote       | 1.5 | 8 |   | 0 | 0 | 1 | 3 | 0  | 0 | Fatigue (1,2), dry, sore eyes (1,1), liver dysfunction (1,5), peripheral neuropathy (1,7) | 4,25          |                                   |
| 28 | HapB3 heterozygote       | 1.5 | 8 |   | 0 | 0 | 1 | 3 | 0  | 0 |                                                                                           |               | no delays                         |

|    |                    |     |   |   |   |   |   |   |   |                                                                             |                                                                         |                                                |
|----|--------------------|-----|---|---|---|---|---|---|---|-----------------------------------------------------------------------------|-------------------------------------------------------------------------|------------------------------------------------|
| 29 | HapB3 heterozygote | 1.5 | 2 | 0 | 1 | 2 | 1 | 2 | 0 | Fatigue (2,2)                                                               | stopped after 2 cycles -bowel obstruction                               | no delays                                      |
| 30 | HapB3 heterozygote | 1.5 | 8 | 0 | 2 | 2 | 3 | 1 | 0 |                                                                             | 6,25                                                                    | 4, 1                                           |
| 31 | HapB3 heterozygote | 1.5 | 8 | 0 | 0 | 1 | 1 | 0 | 1 | Anxiety (1,1), cystitis (2,4), fatigue (1,8)                                | No reductions                                                           | no delays                                      |
| 32 | HapB3 heterozygote | 1.5 | 4 | 0 | 0 | 0 | 0 | 0 | 1 | Died of other causes during cycle 4                                         | No reductions                                                           | no delays                                      |
| 33 | HapB3 heterozygote | 1.5 | 8 | 0 | 0 | 0 | 1 | 0 | 1 | Fatigue (2,1), DVT (3,5), liver dysfunction (1,5)                           | 1 week delay due to DVT                                                 | no delays                                      |
| 34 | HapB3 heterozygote | 1.5 | 8 | 0 | 0 | 0 | 1 | 0 | 1 | Fatigue (1,3), peripheral neuropathy (1,3)                                  | No reductions                                                           | no delays                                      |
| 35 | HapB3 heterozygote | 1.5 | 8 | 1 | 2 | 0 | 3 | 0 | 1 | Altered taste (1,1), dry skin (1,1), sore eyes (1,2), anorexia (1,5)        | 7,25                                                                    | no delays                                      |
| 36 | HapB3 heterozygote | 1.5 | 7 | 1 | 1 | 3 | 1 | 3 | 1 | Infection, pulmonary embolism (4,7)                                         | 2,25                                                                    | 2,1                                            |
| 37 | HapB3 heterozygote | 1.5 | 8 | 0 | 0 | 1 | 1 | 1 | 0 | Fatigue (1,5)                                                               | No reductions                                                           | no delays                                      |
| 38 | HapB3 heterozygote | 1.5 | 3 | 0 | 0 | 0 | 1 | 0 | 0 | Shortness of breath/cough (1,1), loss of appetite (1,2), general pain (1,2) | Patient decision to withdraw due to side effects and caring commitments |                                                |
| 39 | HapB3 heterozygote | 1.5 | 8 | 1 | 0 | 0 | 1 | 0 | 0 | Dry skin/hair (1,1), fatigue (1,7) constipation (1,7)                       | No reductions                                                           | no delays                                      |
| 40 | HapB3 heterozygote | 1.5 | 8 | 0 | 0 | 2 | 3 | 0 | 3 | Sore eyes (1,2)                                                             | 2,25                                                                    | 2,1                                            |
| 41 | HapB3 heterozygote | 1.5 | 8 | 0 | 0 | 2 | 2 | 0 | 0 | Anaemia (1,1), DVT foot (2,5),                                              | No reductions                                                           | 8,2                                            |
| 42 | HapB3 heterozygote | 1.5 | 8 | 0 | 0 | 2 | 0 | 0 | 1 |                                                                             | 3,33                                                                    |                                                |
| 43 | HapB3 heterozygote | 1.5 | 8 | 0 | 0 | 1 | 1 | 0 | 1 | Fatigue(1,6)                                                                | No reductions                                                           | no delays                                      |
| 44 | HapB3 heterozygote | 1.5 | 2 | 0 | 3 | 3 | 0 | 3 | 1 |                                                                             | 2,25. Patient withdrew after cycle 2 due to toxicity                    | Patient stopped after 2 cycles due to toxicity |
| 45 | HapB3 heterozygote | 1.5 | 8 | 0 | 2 | 3 | 2 | 2 | 2 |                                                                             | 2,30                                                                    | 2,1 and 5,1                                    |
| 46 | HapB3 heterozygote | 1.5 | 3 | 0 | 0 | 3 | 1 | 1 | 1 | Liver dysfunction (1,5), sore eyes (1,7)                                    | 4,30                                                                    | 4,1                                            |
| 47 | HapB3 heterozygote | 1.5 | 2 | 0 | 0 | 3 | 1 | 1 | 1 | Upper body rash (1,2)                                                       | patient withdrew due to toxicity                                        | 2,1                                            |
| 48 | HapB3 heterozygote | 1.5 | 7 | 0 | 0 | 3 | 3 | 0 | 1 | Miscellaneous pain (2,2)                                                    | 3,25%                                                                   | Last cycle omitted due to HFS                  |
| 49 | HapB3 heterozygote | 1.5 | 8 | 0 | 0 | 0 | 0 | 0 | 0 | Fatigue (1,4), reduced renal function leading to dose reduction             | 2,17%                                                                   | no delays                                      |

|    |                    |     |   |   |   |   |   |   |   |                                                    |              |                                                                  |
|----|--------------------|-----|---|---|---|---|---|---|---|----------------------------------------------------|--------------|------------------------------------------------------------------|
| 50 | HapB3 heterozygote | 1.5 | 3 | 0 | 0 | 3 | 3 | 0 | 2 |                                                    | 2,25%        | 2,1. Patient stopped capecitabine after 3 cycles due to toxicity |
| 51 | HapB3 heterozygote | 1.5 | 1 | 0 | 0 | 2 | 3 | 0 | 3 | Sore eyes (3,1)                                    | 2,100%       | patient withdrawn due to toxicity                                |
| 52 | HapB3 heterozygote | 1.5 | 8 | 0 | 1 | 3 | 2 | 2 | 2 | Fatigue (1,3), anorexia (3,1)                      | 3,22%, 4,33% |                                                                  |
| 53 | HapB3 heterozygote | 1.5 | 1 | 0 | 0 | 0 | 0 | 0 | 0 | Myocardial infarction, chest pain as symptom (4,1) | 1,100%       | patient withdrawn because of cardiac symptoms                    |
| 54 | HapB3 heterozygote | 1.5 | 1 | 0 | 0 | 0 | 0 | 0 | 0 | Chest pain (1,2)                                   | 1, 100%      |                                                                  |

## References

1. Van Kuilenburg, A.B.; Dobritzsch, D.; Meinsma, R.; Haasjes, J.; Waterham, H.R.; Nowaczyk, M.J.; Maropoulos, G.D.; Hein, G.; Kalhoff, H.; Kirk, J.M.; et al. Novel disease-causing mutations in the dihydropyrimidine dehydrogenase gene interpreted by analysis of the three-dimensional protein structure. *Biochem. J.* **2002**, *364*, 157–163, doi:10.1042/bj3640157.
2. Caudle, E.K.; Thorn, C.F.; Klein, T.E.; Swen, J.J.; McLeod, H.L.; Diasio, R.B.; Schwab, M. Clinical pharmacogenetics implementation consortium guidelines for dihydropyrimidine dehydrogenase genotype and fluoropyrimidine dosing. *Clin. Pharmacol. Ther.* **2013**, *94*, 640–645.
3. Offer, S.M.; Fossum, C.C.; Wegner, N.J.; Stuflesser, A.J.; Butterfield, G.L.; Diasio, R.B. Comparative functional analysis of DPYD variants of potential clinical relevance to dihydropyrimidine dehydrogenase activity. *Cancer Res.* **2014**, *74*, 2545–2554, doi:10.1158/0008-5472.can-13-2482.
4. Van Kuilenburg, A.B.; Meinsma, R.; Beke, E.; Bobba, B.; Boffi, P.; Enns, G.M.; Witt, D.R.; Dobritzsch, D. Identification of three novel mutations in the dihydropyrimidine dehydrogenase gene associated with altered pre-mRNA splicing or protein function. *Biol. Chem.* **2005**, *386*, 319–324.
5. Van Kuilenburg, A.B.P.; Vreken, P.; Abeling, N.G.G.M.; Bakker, H.D.; Meinsma, R.; Van Lenthe, H.; De Abreu, R.A.; Smeitink, J.A.M.; Kayserili, H.; Apak, M.Y.; et al. Genotype and phenotype in patients with dihydropyrimidine dehydrogenase deficiency. *Qual. Life Res.* **1999**, *104*, 1–9, doi:10.1007/pl00008711.
6. Vreken, P.; Van Kuilenburg, A.B.P.; Meinsma, R.; Van Gennip, A.H. Dihydropyrimidine dehydrogenase (DPD) deficiency: Identification and expression of missense mutations C29R, R886H and R235W. *Qual. Life Res.* **1997**, *101*, 333–338, doi:10.1007/s004390050637.
7. Offer, S.M.; Wegner, N.J.; Fossum, C.; Wang, K.; Diasio, R.B. Phenotypic profiling of DPYD variations relevant to 5-fluorouracil sensitivity using real-time cellular analysis and in vitro measurement of enzyme activity. *Cancer Res.* **2013**, *73*, 1958–1968, doi:10.1158/0008-5472.can-12-3858.
8. Rosmarin, D.; Palles, C.; Pagnamenta, A.; Kaur, K.; Pita, G.; Martin, M.; Domingo, E.; Jones, A.; Howarth, K.; Freeman-Mills, L.; et al. A candidate gene study of capecitabine-related toxicity in colorectal cancer identifies new toxicity variants at DPYD and a putative role for ENOSF1 rather than TYMS. *Gut* **2015**, *64*, 111–120.
9. Morel, A.; Boisdron-Celle, M.; Fey, L.; Soulie, P.; Craipeau, M.C.; Traore, S.; Gamelin, E. Clinical relevance of different dihydropyrimidine dehydrogenase gene single nucleotide polymorphisms on 5-fluorouracil tolerance. *Mol. Cancer Ther.* **2006**, *5*, 2895–9204.
10. Ezzeldin, H.H.; Lee, A.M.; Mattison, L.K.; Diasio, R.B. Methylation of the DPYD promoter: An alternative mechanism for dihydropyrimidine dehydrogenase deficiency in cancer patients. *Clin. Cancer Res.* **2005**, *11*, 8699–8705, doi:10.1158/1078-0432.ccr-05-1520.
11. Saif, M.W.; Lee, A.M.; Offer, S.M.; McConnell, K.; Relias, V.; Diasio, R.B. A DPYD variant (Y186C) specific to individuals of African descent in a patient with life-threatening 5-FU toxic effects: Potential for an individualized medicine approach. *Mayo Clin. Proc.* **2014**, *89*, 131–136, doi:10.1016/j.mayocp.2013.09.008.
12. Meulendijks, D.; Henricks, L.M.; Van Kuilenburg, A.B.P.; Jacobs, B.A.W.; Aliev, A.; Rozeman, L.; Meijer, J.; Beijnen, J.H.; De Graaf, H.; Cats, A.; et al. Patients homozygous for DPYD c.1129-5923C>G/haplotype B3 have partial DPD deficiency and require a dose reduction when treated with fluoropyrimidines. *Cancer Chemother. Pharmacol.* **2016**, *78*, 875–880, doi:10.1007/s00280-016-1317-0.

13. Offer, S.M.; Butterfield, G.L.; Jerde, C.R.; Fossum, C.C.; Wegner, N.J.; Diasio, R.B. MicroRNAs miR-27a and miR-27b directly regulate liver dihydropyrimidine dehydrogenase expression through two conserved binding sites. *Mol. Cancer Ther.* **2014**, *13*, 742–751, doi:10.1158/1535-7163.mct-13-0878.
14. Henricks, L.M.; Lunenburg, C.A.; Meulendijks, D.; Gelderblom, H.; Cats, A.; Swen, J.J.; Schellens, J.H.; Guchelaar, H.J. Translating DPYD genotype into DPD phenotype: Using the DPYD gene activity score. *Pharmacogenomics* **2015**, *16*, 1277–1286.
15. Lunenburg, C.A.T.C.; Van Der Wouden, C.H.; Nijenhuis, M.; Rhenen, M.H.C.-V.; De Boer-Veger, N.J.; Buunk, A.M.; Houwink, E.J.F.; Mulder, H.; Rongen, G.A.; Van Schaik, R.H.N.; et al. Dutch pharmacogenetics working group (DPWG) guideline for the gene–drug interaction of DPYD and fluoropyrimidines. *Eur. J. Hum. Genet.* **2019**, *28*, 508–517, doi:10.1038/s41431-019-0540-0.
16. Amstutz, U.; Henricks, L.M.; Offer, S.M.; Barbarino, J.; Schellens, J.H.; Swen, J.J.; Klein, T.E.; McLeod, H.L.; Caudle, K.E.; Diasio, R.B.; et al. Clinical pharmacogenetics implementation consortium (CPIC) guideline for dihydropyrimidine dehydrogenase genotype and fluoropyrimidine dosing: 2017 update. *Clin. Pharmacol. Ther.* **2018**, *103*, 210–216, doi:10.1002/cpt.911.
